1  
2  
3  
4  
5  
6  
7  
8  
9  
10  
11  
12  
13  
14  
15  
16  
17  
18  
19  
20  
21  
22  
23  
24  
25  
26  
27  
28  
29  
30

**A Unit Pipe Pneumatic model to simulate gas kinetics during measurements of embolism in excised angiosperm xylem**

Dongmei Yang<sup>1</sup>, Luciano Pereira<sup>2,3</sup>, Guoquan Peng<sup>1\*</sup>, Rafael V. Ribeiro<sup>2</sup>, Lucian Kaack<sup>3</sup>, Steven Jansen<sup>3</sup>, and Melvin T. Tyree<sup>1\*</sup>

<sup>1</sup>College of Chemistry and Life Sciences, Zhejiang Normal University, Jinhua, Zhejiang, China.

<sup>2</sup>Laboratory of Crop Physiology, Department of Plant Biology, Institute of Biology, University of Campinas (UNICAMP), Campinas SP, Brazil.

<sup>3</sup>Institute of Systematic Botany and Ecology, Ulm University, Ulm, Germany

Corresponding Authors:

Guoquan Peng, Email: [pengggq@zjnu.cn](mailto:pengggq@zjnu.cn), Phone number: +86 182 5784 6105

Melvin T. Tyree, Email: [mel.tyree@cantab.net](mailto:mel.tyree@cantab.net), Phone number: +86 182 5784 6839 or 1-802-777-3094

**Short title:** A unit pipe pneumatic model to simulate gas kinetics

**Word count**

Total: 6762

Introduction: 1030

Model description: 1882

Results: 2583

Discussion: 1267

Number of Figures: 7

Number of Color Figures: 6

Number of Tables: 3

Supporting information: Fig. S1, Table S1, Table S2, Note S1

31 **Abstract**

32

- 33 • The Pneumatic method has been introduced to quantify embolism resistance in plant xylem of  
34 various organs. Despite striking similarity in vulnerability curves between the Pneumatic and  
35 hydraulic methods, a modeling approach is highly needed to demonstrate that xylem embolism  
36 resistance can be accurately quantified based on gas diffusion kinetics.
- 37 • A Unit Pipe Pneumatic (UPPn) model was developed to estimate gas diffusion from intact  
38 conduits, which were axially interconnected by interconduit pit membranes. The physical laws  
39 used included Fick's law for diffusion, Henry's law for gas concentration partitioning between  
40 liquid and gas phases at equilibrium, and the ideal gas law.
- 41 • The UPPn model showed that 91% of the extracted gas came from the first two series of  
42 embolized, intact conduits, and only 9% from the aqueous phase after 15 s of simulation.  
43 Embolism resistance measured with a Pneumatic apparatus was systematically overestimated  
44 by 2 to 17%, corresponding to a typical measuring error of 0.11 MPa for  $P_{50}$  (the water potential  
45 equivalent to 50% of the maximum amount of gas extracted).
- 46 • Because results from the UPPn model are supported by experimental evidence, there is a good  
47 theoretical and experimental basis for applying the pneumatic method to research on embolism  
48 resistance of angiosperms.

49

50 Key words: unit pipe, pneumatic model, gas diffusion, Pneumatron, vulnerability curves,  
51 embolism, xylem conduits, angiosperms

52

53

54

## 55 Introduction

56 According to the cohesion tension theory (CTT), water is transported in land plants under tensile  
57 conditions. The concept of tensile properties of water in vessels and tracheids of xylem tissue is  
58 contrary to the normal indoctrination of students of applied physics (e.g., mechanical engineering)  
59 because they are taught that only solids possess tensile properties, while liquids by “definition” do  
60 not. However, a pulling force can be applied to liquids enclosed in certain liquid containers to  
61 stretch and break them. CTT has withstood challenges over time (e.g., Benkert *et al.*, 1995) through  
62 rebuttals based on reviews of past literature (Tyree, 1997), cell pressure probe experiments (Wei  
63 *et al.*, 1999), and centrifuge experiments (Cochard *et al.*, 2005). Tensile properties arise in water  
64 when confined to xylem conduits, which are xylem lumina with nanoscale pores in their cell walls.  
65 Therefore, the transport system from fine roots to the evaporative surface of leaves is composed  
66 of many intact pipes interconnected via pit membranes, which represent modified primary cell  
67 walls mainly composed of cellulose (Kaack *et al.*, 2019).

68 Even though CTT has withstood the test of time, the transport of tensile water is prone to failure  
69 (Cochard *et al.*, 2013). Immediately after a cavitation event (tensile failure), the conduit fills with  
70 a low-pressure void that consists primarily of water vapor. These voids eventually fill up with air  
71 at atmospheric pressure following Henry’s law, which describes the nature of the equilibrium  
72 between atmospheric gases and gases dissolved in water. One version of Henry’s Law can be  
73 written as:

74

$$75 \frac{[x]_w}{[x]_a} = H^{cc} \quad (1)$$

76 where  $[x]$  represents the mean concentration ( $\text{mol L}^{-1}$ ) of gas  $x$  in water,  $w$ , or air,  $a$ , depending on  
77 the subscript.  $H^{cc}$  is a constant and approximately  $10^{-2}$  for different gas species. The concentration  
78 of gas in the air phase comes from the ideal gas law:

79

$$80 [x]_a = \frac{n_x}{V} = \frac{P_x}{RT} \quad (2)$$

81

82 where  $n_x$  is the number of moles of gas  $x$  in volume  $V$ ,  $P_x$  is the partial pressure of gas  $x$ , and  $RT$  is  
83 the universal gas constant multiplied by temperature in Kelvin.

84 In xylem conduits of plants, gases can appear after cavitation events if water remains in the  
85 tensile state and disappear if water returns to a non-tensile state slightly below atmospheric  
86 pressure. Modeling and experiments have determined the kinetics of bubble disappearance in  
87 conduits when the fluid pressure is near or above atmospheric pressure (Yang & Tyree, 1992;  
88 Tyree & Yang, 1992). Recent work has also focused on how long it takes a newly cavitated conduit  
89 to fully embolize, that is, when Ar, O<sub>2</sub>, and N<sub>2</sub> reach partial pressures in the conduit equal to those  
90 in ambient air. Answers have come from theoretical models and experiments in which the focus  
91 has been on the speed of radial gas diffusion between conduits inside stems to the outside surface  
92 of the bark (Wang *et al.*, 2015). This radial movement of gas from bubbles in conduits to the  
93 ambient atmosphere is basically controlled by Fick's law of diffusion expressed in radial  
94 coordinates. This rate of diffusion of gases in water is very slow. Hence, even for stems less than  
95 10 mm in diameter, the time for equilibrium can be hours to days depending on the diameter and  
96 the diffusion coefficient of gases in wet woody stems. In all of the studies cited above, axial  
97 diffusion was not included in the modeling, and the experimental designs for model verification  
98 inhibited most of the axial diffusion.

99 While these former models are useful and interesting, they do not apply to the new experimental  
100 situation inherent in the Pneumatic method (Pereira *et al.*, 2016; Zhang *et al.*, 2018) and the  
101 invention of the Pneumatron (Pereira *et al.*, 2020; Jansen *et al.*, 2020). The Pneumatron consists  
102 of an air pressure sensor connected by tubing to the cut end of a shoot with leaves, and it is used  
103 to measure the kinetics of diffusion from newly embolized, intact vessels to the embolized vessels  
104 at the cut surface of a terminal branch. This process involves axial diffusion of gases via hydrated  
105 pit membranes, which are typically only 0.2 to 1.3 μm thick (Li *et al.*, 2016; Kaack *et al.*, 2019).  
106 Over these short distances, diffusion can be quite quick. In axial transport, the median time,  $t_m$ , for  
107 a gas to diffuse across a distance  $s$  is given by:

108

$$109 \quad s^2 = 2D_g t_m \quad (3)$$

110

111 where  $D_g$  is the coefficient of diffusion of the gas species  $g$  (in m<sup>2</sup> s<sup>-1</sup>), and  $s$  is the distance (in m)  
112 that half the molecules traverse in time  $t_m$  (in seconds). Gases in water have  $D_g = 2 \times 10^{-9}$  m<sup>2</sup> s<sup>-1</sup>,  
113 so the time to diffuse through 1 μm of water is approximately 0.25 ms, but the time to diffuse

114 through 0.01 m of water is  $2.5 \times 10^4$  s ( $\cong$  7 h). Consequently, gases spread axially down cut  
115 branches more rapidly than radially through stems.

116 The Pneumatic method involves measuring the kinetics of gas movement down the axis of a  
117 stem while independently measuring the stem water potential with a stem hygrometer  
118 (thermocouple psychrometer connected to a stem) or by measuring the balance pressure of excised  
119 leaves with a pressure chamber. Since 2016, the Pneumatic method has been used to estimate the  
120 vulnerability curves (VCs) of woody species where the interpretation of what is measured is based  
121 on qualitative arguments, or by comparing pneumatic VCs to VCs measured by more conventional  
122 hydraulic (Pereira *et al.*, 2016, 2020, 2021; Zhang *et al.*, 2018, Sergent *et al.*, 2020; Chen *et al.*,  
123 2020) and non-hydraulic techniques (Sergent *et al.*, 2020; Chen *et al.*, 2020; Guan *et al.*, 2021).

124 What is clearly lacking in our full understanding of pneumatic measurements is a modeling  
125 approach of the gas diffusion kinetics along an axial pathway of conduits and radial pathways of  
126 stems. Therefore, the purpose of this study is to provide a theoretical background for pneumatic  
127 measurements, with the aim of proving that the theoretical kinetics of pressure change via diffusion  
128 of gases axially through intervessel pit membranes follows the proportion of embolized vascular  
129 tissue, either on a volume basis or hydraulic conductance basis. The model presented in this paper  
130 complements experimental evidence in recent papers (Pereira *et al.*, 2020, 2021; Guan *et al.*, 2021;  
131 Paligi *et al.*, submitted).

132

## 133 **Model description**

### 134 *Basic concepts of pneumatic measurements*

135 In typical pneumatic experiments, the air pressure in all embolized vessels is assumed to be in  
136 equilibrium with the ambient air. In a measuring cycle, a partial vacuum (40 kPa absolute pressure)  
137 is drawn in  $<1$  s at the cut surface of the stem. The stem is connected to a small, known volume of  
138 tubing, and air space is connected to a pressure transducer. Then, the vacuum pump is turned off,  
139 and the pressure is monitored every 0.5 s for  $\leq 30$  s, during which time the pressure increases by  
140 10 to 20 kPa to an absolute pressure of 50 to 60 kPa. This is called air discharge. At the end of a  
141 measuring cycle, the air pressure is returned to atmospheric pressure for nearly 20 min to ensure  
142 that atmospheric pressure has been restored in all embolized vessels that are in axial contact with  
143 the cut open vessels.

144

145 *Basic idea of the Unit Pipe Pneumatic model (UPPn model)*

146 All the theoretical calculations involve Fick's law for the diffusion of gases, Henry's law for  
147 gas concentrations at air/water interfaces, and the ideal gas law to relate air pressure to gas  
148 concentrations. Fick's first law is used in radial or Cartesian coordinates as needed (Crank, 1975).

149 The Unit Pipe Pneumatic model (UPPn model) approximates the three-dimensional vessel  
150 network in angiosperm xylem (Zimmermann & Tomlinson, 1966). This model may provide a valid  
151 approach because the kinetics of axial gas exchange between embolized vessels (pipes) is much  
152 faster than that of radial diffusion between the surface of stems and embolized vessels. The model  
153 simulates the rate of gas extraction axially from embolized vessel lumina to the pressure  
154 transducer, and radially from the gas dissolved in the water of the surrounding xylem tissue. Axial  
155 transfer of gas occurs between closed (intact) vessels and cut-open vessels via diffusion through  
156 water spaces in the cellulose of intervessel pit membranes (Fig.1a).

157 An important observation in the pneumatic method is that, at the beginning of an experiment,  
158 the quantity of gas discharge (measured in pressure change,  $\Delta P$ ) is minimal when there is zero  
159 embolism, but rises to a maximum difference when all vessels are embolized. If the vessel lumina  
160 hold only 10% of the water volume of woody stems, then the embolized vessels will contain  
161 approximately 5.8 times more moles of air than is dissolved in the 9-times-larger water volume  
162 surrounding the embolized vessels. Our model shows that the amount of gas extracted from the  
163 water of non-embolized wood is less than 10% of the gas extracted from the embolized vessels  
164 during the early part of the 30 s measuring cycle. This is because the rate of axial diffusion of gases  
165 from vessel to vessel is very fast and is rate-limited only by diffusion through the wet pit  
166 membranes. In comparison, the radial rate of diffusion is over an average radial distance of  
167 approximately 30 to 100  $\mu\text{m}$  and is consequently much slower. Hence, axial diffusion is up to 100  
168 times faster than radial diffusion.

169

170 *Transport and equilibrium coefficients used in the UPPn model*

171 Henry's law constants and Fick's law coefficient of diffusion in air and pure water are shown  
172 in Table 1. In our model, we used a weighted average for Henry's constant and the diffusion  
173 coefficient of air,  $H^{cc} = 1.83 \times 10^{-2}$  and  $D_{air,aq} = 2.06 \times 10^{-9} \text{ m}^2 \text{ s}^{-1}$ , respectively. Fresh (i.e., non-  
174 shrunken, non-dried) pit membranes have cellulose fibers with no lignin and an estimated pore  
175 volume fraction of 80%, which means that 80% of wet pit membranes are water (Zhang *et al.*,

176 2020). The conventional method of dealing with a mixture of solids and water is to reduce the  
177 diffusion coefficient by the percentage of space that is water: 80%. The rate of oxygen diffusion  
178 in lignified wood of several species has been found to be one to two orders of magnitude less than  
179 that in pure water (Sorz & Hietz, 2006), so the value for radial diffusion should be reduced  
180 accordingly. The coefficient of diffusion of gases in air is four orders of magnitude larger than that  
181 in water, and in embolized vessels, the mass flow of gases can accelerate pressure equilibrium  
182 even more.

183

#### 184 *The UPPn model*

185 The UPPn model was used in this study because it is simple enough to be programmed and  
186 solved in an Excel spreadsheet. The Excel spreadsheet can be created with all equations embedded  
187 into cells and solved in a printed mathematical format. The Excel spreadsheet also has most of the  
188 intermediate and all of the final calculation results presented automatically in graphical format.  
189 This spreadsheet is available in the Supplementary Information (Table S1). Hence, only the  
190 essential features of the model are introduced below.

191 In UPPn, we modeled for the two slowest processes: (1) axial gas diffusion, rate-limited by  
192 diffusion across pit membranes, and (2) radial gas diffusion in concentric rings surrounding a  
193 single, embolized vessel. The radial path length and volume were adjusted in each calculation so  
194 that all wood volume in a stem was divided equally between all embolized vessels. Hence, if a  
195 model stem had  $V_s$  volume of non-embolized space (vascular and non-vascular volume) and a  
196 count of  $N_e$  embolized vessels each of volume  $V_v$ , then each vessel was assumed to be surrounded  
197 by  $V_s/N_e - V_v$  of non-embolized wood volume per vessel. Therefore, the water-saturated wood  
198 volume surrounding a unit embolized vessel changed with percent embolized vessels. As shown  
199 in Fig. 1a, the unit pipe consisted of a cut-open vessel (left; colored gray) and one or more intact  
200 vessels (right; colored blue). Every cut-open vessel on the left was embolized and hence had the  
201 minimum amount of water-saturated wood in the outside radius (white). Assuming 25% embolism  
202 in Fig. 1a, the woody tissue volume on the right side was twice the diameter and four times the  
203 volume as on the left side. As the percentage loss of conductivity (*PLC*) varied, the ratio of water-  
204 saturated wood to embolized vessel diameter changed accordingly (Fig. 1b).

205 The UPPn model provides an adequate resolution of the time course of pressure changes in  
206 vessels after a partial vacuum is drawn on all cut-open vessels. Because stem samples prepared for

207 pneumatic measurements are cut in the air and the cut-open vessels become quickly embolized,  
208 they function as an extension of the discharge tubing. We assumed that only mature functional  
209 vessels were capable of forming embolisms. Therefore, living immature vessels, cambium, and  
210 living bark cells have no embolism. Hence, unit pipes near the boundary between mature and  
211 developing vessels would also receive some air by diffusion through the water-saturated wood  
212 volume, cambium layer, and living phloem in bark. The UPPn model slightly underestimated the  
213 rate of pressurization of vessels near the surface of the stem, but because radial diffusion is much  
214 slower than axial diffusion, this amount of error was acceptable over the time domain of the model  
215 (typically 15 s). The fastest diffusion occurred axially through the intervessel pit membranes over  
216 an average length of 3 to 30 cm. Therefore, most of the air extracted by the Pneumatron came from  
217 axial diffusion because of the high axial diffusional rates, and because the amount of air in the  
218 aqueous solution was only 2% of the concentration in the embolized vessels.

219 Conventionally, Pneumatron data is used to compute the ratio of gas discharge after a fixed time  
220 of 15 to 30 s. Empirically, the amount of gas discharged into a fixed volume  $V_o$  causes a pressure  
221 increase by  $\Delta P$ . The pressure discharge is the least,  $\Delta P_{min}$ , at the start of an experiment and  
222 greatest,  $\Delta P_{max}$ , at the end. A dimensionless value is calculated that correlates with the percentage  
223 embolism:

224

$$225 \quad P_{AD,i} = \frac{\Delta P_i - \Delta P_{min}}{\Delta P_{max} - \Delta P_{min}} = PLC_{Pn} \quad (4)$$

226

227 where  $P_{AD,i}$  is the  $i^{\text{th}}$  percentage air discharge but could also be called  $PLC_{Pn}$ , the assumed measured  
228  $PLC$  by the Pneumatron.

229 The same relative discharge is calculated for ideal gases whether one uses pressure,  
230 concentration, or moles of gas in Eq. (4). The assumption is that  $P_{AD,i}$  is closely related to  $PLC_{Pn}$ ,  
231 which could equally be percent embolized vessel volume or percent loss of hydraulic conductivity  
232 in a unit pipe model. The purpose of these models is to investigate how the theoretically computed  
233  $P_{AD,i}$  relates to hydraulic  $PLC$  values. In the UPPn model, all vessel diameters are equal. When  
234 there is a range of vessel diameters ( $d_v$ ), and if some of the diameters are more vulnerable than  
235 others, then the percent vessel volume is proportional to  $d_v^2$ , but the conductance is proportional  
236 to  $d_v^4$ .



237

238 *Radial and axial diffusion through the wood*

239 In the numerical simulation, there are only two types of rate constants that must be calculated,  
240 and they depend on the values listed in Table 2. One type of rate constant is for radial diffusion,  
241 the other is for axial diffusion, and both use Fick's first law for diffusion in radial or Cartesian  
242 coordinates (Crank, 1975).

243 The radial diffusion pathway was divided into six concentric rings of radial step  $\Delta r$ . The rate  
244 constant for each concentric ring was unique, depending on the radial diffusion coefficient of gases  
245 in lignified wood ( $D_{gw}$ ), vessel length ( $\Delta L_v$ ), radius of the  $i^{\text{th}}$  ring ( $r_i$ ), volume of each cylindrical  
246 concentric ring ( $V$ ), and time step ( $\Delta t$ ). The Excel spreadsheet computes the change in  
247 concentration of gases ( $\Delta C$ ) in time increment ( $\Delta t$ ). In the radial and axial paths, the rate constants  
248 for diffusion had  $\Delta t$  included. This is done to increase the speed of update of the  $\Delta C$  values in each  
249 row of the Excel spreadsheet. The meaning of all symbols is given in Table 2. The rate constant  
250 for radial diffusion is:

251

252 
$$k_{r,i} = \frac{2\pi D_{gw} \Delta L_v \Delta t}{\ln\left(\frac{r_i}{r_i - \Delta r}\right)} \quad (5)$$

253

254 The equation for the last ( $n^{\text{th}} = 6^{\text{th}}$ ) ring is:

255

256 
$$\Delta C_n = \frac{-k_n(C_n - C_{n-1})}{V_n} \quad (6)$$

257

258 For the intermediate  $i^{\text{th}}$  ring, the equation is:

259

260 
$$\Delta C_i = \frac{k_{i+1}(C_{i+1} - C_i) - k_i(C_i - C_{i-1})}{V_i} \quad (7)$$

261

262 For the innermost ring next to the vessel, the equation is:

263

264 
$$\Delta C_1 = \frac{k_2(C_2 - C_1) - k_1(C_1 - H^{CC}C_2)}{V_1} \quad (8)$$

265

266 Regarding axial diffusion, the rate constant of each vessel in series is:

267

$$268 \quad k_a = \frac{\Delta t A_p D_g H^{CC}}{d_m} \quad (9)$$

269

270 where  $A_p$  and  $d_m$  are the area and thickness, respectively, of the pit membranes in the axial path.

271 Then, the change of concentration in each time step is:

272

$$273 \quad \Delta C_i = \frac{k_a (C_{v,i} - C_{v,i-1})}{V_i} \quad (10)$$

274

275 All of the above equations are included in the appropriate Excel cells (Table S1). At time  
276 zero, the intact vessel is assumed to be filled with air at atmospheric pressure, but the cut-open  
277 vessel has been reduced to an initial pressure (concentration) given by the ideal gas law. The  
278 Pneumatron draws down the pressure over a period of 1 s or less. Then, after each time step, Eqs  
279 5, 7, 9, and 10 are used to calculate the change in concentration in each Excel cell where each cell  
280 represents a location in the vessel or surrounding water-filled wood. Then, before the next time  
281 step, each concentration is adjusted by the corresponding  $\Delta C$  value computed for the time interval  
282  $\Delta t$ . The answers are put into the Excel row corresponding to the elapsed time. The reader is referred  
283 to supplemental material for the Excel spreadsheet and a description of the basic layout of the sheet  
284 (Table S1). Some of the key anatomical values (Table 2) that are needed in the Excel spreadsheet  
285 are the diffusion coefficients in wood (Sorz & Hietz, 2006), vessel dimensions in wood (Zanne *et*  
286 *al.*, 2010; Morris *et al.*, 2016), and pit membrane thicknesses in vessels (Li *et al.*, 2016; Kaack *et*  
287 *al.*, 2019).

288

## 289 **Results**

### 290 *Pressure dynamics over a 150-s period*

291 First, consider the case for 50% of vessels embolized. A UPPn model simulation of pressure is  
292 shown in Fig. 2. The only parameter measured by the Pneumatron is the pressure in the cut open  
293 vessels (blue line, labeled '#0') computed from the concentration ( $n/V$ ) by the ideal gas law  $P =$   
294  $(n/V)RT$ . The pressure in the first intact vessel started out at atmospheric pressure. The temporal

295 dynamics of the axial pressures simulated in ten vessels connected axially are shown in Fig. 2. It  
296 can be seen that, in the first 15 s, almost no change in pressure was registered beyond the fifth  
297 vessel in series. The conclusion is that the Pneumatron can detect the pneumatic influence of only  
298 the first few vessels in the axial chain of embolized vessels.

299 According to the UPPn model, most of the extracted gas came from the embolized vessels  
300 rather than the aqueous phase surrounding the vessels. After 15 s, the total gas drawn into the  
301 volume space connected to the pressure transducer (i.e., the discharge tube) came from the  
302 embolized vessel space and the aqueous phase surrounding the embolized vessel. Based on Fick's  
303 law of diffusion, the total amount of gas extracted was  $1.53 \times 10^{-9}$  moles, of which 91% came from  
304 the embolized space and only 9% from the aqueous phase. Even after 150 s, the percentages of gas  
305 extracted from the gas and liquid phases were 84% and 16%, respectively.

306 Each solution depends on the parameters shown in Table 2 and the assumed percentage of  
307 embolized vessels. In the solution above, the model assumed 50% embolism. Hence, the radius of  
308 the external tissue was minimum in the cut-open vessels and greater in the 50% embolized zone.  
309 The radial gas concentrations in the six concentric rings of water-filled tissues to the right of the  
310 cut-open vessels were computed (Figs. 1a and 3a). The concentric ring concentrations of gas  
311 reached a minimum value and then began to rise again, which was a consequence of the nature of  
312 the simulation. The concentrations of gas in the concentric rings of intact vessels changed less than  
313 in those of the cut-open vessels. After >50 s, the gas concentrations in the rings started to increase  
314 because of air-entry from vessels further down the chain. The third and sixth vessels along the axis  
315 showed much smaller changes in dissolved gas concentration over the same 150 s (Fig. 3b, c). The  
316 conclusion from this simulation is that, even if there are many vessels in an axial chain that are  
317 embolized, the amount of gas extracted in the first 15 s of the extraction process comes mostly  
318 from the first two intact vessels.

319

### 320 *Pressure kinetics with zero embolism ( $P_{min}$ )*

321 In this case, the pneumatic model solves for a cut-open vessel that is half the mean vessel length.  
322 There is no axial draw of air because all axial intact vessels are water-filled. Therefore, we must  
323 consider only the exchange of air from water-filled wood radially adjacent to the cut-open unit  
324 pipe. In the Excel spreadsheet (Table S1), this is easily programmed by changing a Boolean  
325 variable (cell L44) from false to true, which indicates that the spreadsheet does not consider axial

326 flow from vessels distal to the cut-open vessels because there are no embolized, intact vessels to  
327 allow axial flow (except for the cut-open vessels). The spreadsheet for this simple case computed  
328 a very small change in moles of gas in the external chamber connected to the pressure transducer:  
329  $7.45 \times 10^{-11}$  mol after 15 s and  $1.54 \times 10^{-10}$  mol after 150 s. Theoretically, this should be the same  
330 as setting *PLC* (cell O39) to zero, but this will cause the program to crash because this value is  
331 used to compute the radial distance of water-filled tissue between equally spaced embolized  
332 vessels. In practice, it is better to maintain the *PLC* above 5% even though the Excel spreadsheet  
333 computes outputs for values as low as <0.1%, but the output grows increasingly inaccurate for  
334 small values of *PLC* in cell O39.

335

### 336 *Pneumatron absolute pressure curves and $PLC_{Pn}$ curves versus model input *PLC**

337 The impact of the extractable gas (model output) as the input *PLC* increases from zero (cell L44  
338 = true) to 100% (cell L44 = false, cell O39 set to the desired *PLC*) is shown in Fig. 4a. Minimal  
339 change in pressure  $\Delta P_{min}$  occurs at 0% *PLC* input, and the maximum  $\Delta P_{max}$  occurs when 100%  
340 *PLC* is inputted. Readers should remember that, in the UPPn model, an increase in *PLC* is  
341 equivalent to a decrease in the radius of non-embolized water/tissue around the embolized vessel.  
342 The conventional method of estimating the *PLC* in previous experimental studies was to pick some  
343 time interval (e.g., 15 or 30 s) and then compute  $PLC_{Pn}$  following Eq. (4). Taking the  $\Delta P_i$   
344 measurements at 15 s for every curve in Fig. 4a produces the results shown in Fig. 4b. The  
345 relationship is slightly curvilinear, with a maximum deviation of approximately 5% at the 50%  
346 *PLC* input value.

347

### 348 *Sensitivity analysis*

349 The rate-limiting steps for gas movement occurred when gas was forced to move through water  
350 by diffusion. When there was no embolism at all in intact vessels, the gas extraction was limited  
351 to what came out of solution from the surrounding water radially connected to the cut-open vessel  
352 [ $\Delta P_{min}$  in Eq. (4)]. When vessels were embolized, the maximum air extraction occurred from the  
353 embolized vessel plus the extraction from the water-filled tissue surrounding the vessel [ $\Delta P_{max}$  in  
354 Eq. (4)]. There would be a perfect match between the volume of embolized intact vessels and  
355  $PLC_{Pn}$  in Eq. (4) if no gas was drawn out radially from the surrounding tissue.

356 The rate of gas extraction from intact vessels was faster than that from surrounding water  
357 because the diffusional path length equaled the pit membrane thickness per vessel (0.2 to 1.2  $\mu\text{m}$ ),  
358 whereas radial diffusion was over a distance of 60 to 150 times the typical pit membrane path  
359 length (30  $\mu\text{m}$  to 75  $\mu\text{m}$  depending on vessel diameter) when the volume fraction of the vessel  
360 occupied 10% of the cross-sectional area of the wood.

361 The mass flow rate of gas down the length of the vessel lumen was much more efficient than  
362 that of diffusion. The maximum gas flow down the axis of the vessel occurred in the first vessel  
363 adjacent to the cut-open vessel immediately after the vacuum was drawn. The theoretical pressure  
364 drop needed to maintain flow down the entire vessel length was calculated to be  $<10^{-4}$  Pa out of  
365 nearly  $10^5$  Pa initial pressure; hence, pressure gradients through the length of intact vessels can be  
366 ignored compared with the pressure difference across intervessel pit membranes.

367 In most simulations, the amount of gas extracted in the first 15 s (the measuring cycle of the  
368 Pneumatron) was  $>90\%$  from the vessels. Vessel length had no impact on the fraction of extracted  
369 gas because increasing vessel length increased the moles of air in the embolized vessel and  
370 increased in exact proportion to the moles of air in the surrounding water-saturated tissue. In  
371 contrast, increasing the vessel diameter increased the percentage of gas extracted from the  
372 embolized vessels, even though the volume of water-saturated annuli dramatically increased with  
373 the vessel diameter (Fig. 5). If gas extraction from embolized stems was 100% from vessel lumina  
374 with nothing from the water-saturated annuli around the vessels, then the Pneumatic technique  
375 would provide an accurate measurement of the volume of embolized vessels. However, a precision  
376 of 85 to 95% was not bad given how easy and inexpensive the Pneumatic method and Pneumatron  
377 respectively are. These percentages were computed for an analysis period of 15 s. The decision  
378 about the appropriate time interval for analysis of real experiments versus simulated data is  
379 addressed in the discussion with one experimental example. All the percentages in Fig. 5 were  
380 computed for the 50% embolism case. The agreement improves slightly as the input *PLC*  
381 decreases. For example, for a 40- $\mu\text{m}$  diameter vessel, the percentage gas extraction increased from  
382 90.3% at 100% *PLC* input to 91.0% at 10% embolism input.

383 So far, we have presented results from the UPPn model using only one set of input parameters,  
384 as shown in Table 2. These are the default values available to readers who wish to download our  
385 Excel file. The only factor that changed was the input *PLC* value. We must now examine how  
386 much the model output changed when other input values were selected that might have influenced

387 the UPPn model. Based on quantitative anatomy, the values in Table 2 cannot be independently  
388 varied and expected to be meaningful (Sperry *et al.*, 2005, 2006; Hacke *et al.*, 2006). For example,  
389 vessel length ( $L_v$ ) scales with vessel diameter squared, and  $L_v(\text{cm}) \cong 2.6 \times 10^{-2} D_v^{1.48}(\mu\text{m})$  (Liu *et*  
390 *al.*, 2018); converting both sides to meters yielded  $L_v = 2.00 \times 10^5 D_v^{1.48}$ . In addition, end wall  
391 resistivity in pits scales with lumen resistivity with a slope near one. The initial UPPn model took  
392 these factors into account when default values were loaded in Table 2 (copied from the Excel file  
393 available for download). All values of  $L_v$  in Sperry *et al.* (2005, 2006) and Hacke *et al.* (2006)  
394 seem rather short compared with those in recent literature (Liu *et al.*, 2018), but we can safely skip  
395 this debate because the UPPn model was insensitive to  $L_v$ .

396

### 397 *Influence of axial conductance ( $k_a$ ) on Pneumatron results*

398 The axial conductance ( $k_a$ ) used in the calculations is a diffusional conductance for air, whereas  
399 the statement about hydraulic resistivities being nearly equal refers to the resistance to water flow  
400 per unit length of wood. Pit membranes are typically 0.3 to 0.5  $\mu\text{m}$  thick (range about 0.2 to 1.2  
401  $\mu\text{m}$ ) compared with vessel lumen lengths that are  $10^4$  to  $10^6$  times longer (5 to 50 cm or more).  
402 The UPPn model considers the rate-limiting step of the diffusion of gases through the water-filled  
403 spaces of pits that are approximately 80% water by volume in fresh pit membranes (Zhang *et al.*,  
404 2020).

405 The model predicted, after 15 s, that >90% of the gases drawn into the tubing connected to the  
406 pressure transducer came from axial gas extracted from embolized vessels, and less than 10% came  
407 from gases dissolved in the water of fully hydrated tissue surrounding the vessel. Therefore, we  
408 started with the assumption that factors influencing  $k_a$  dominated the gas-extraction process. There  
409 are four constants in Eq. (9). The value of  $\Delta t$  is the time step used for the iterative solution of the  
410 equations, and the only thing we do with that is pick a small enough value so that the solution is  
411 stable. The two most variable constants are the pit membrane area between adjacent vessels ( $A_p$ )  
412 and the thickness of the pit membrane ( $d_m$ ). The value of  $A_p$  seems to range over two orders of  
413 magnitude from  $3 \times 10^{-7}$  to  $3 \times 10^{-9} \text{ m}^2$  (Wheeler *et al.*, 2005; Hacke *et al.*, 2006; Lens *et al.*, 2011;  
414 Jansen *et al.*, 2011; Scholz *et al.*, 2013) and has been suggested to be negatively correlated with  
415 vulnerability to embolism (Wheeler *et al.*, 2005; Hacke *et al.*, 2006; but see Kaack *et al.*,  
416 submitted). The value of  $d_m$  was not considered in Hacke *et al.* (2006), but we now know it ranges  
417 from 0.2 to 1.2  $\mu\text{m}$  and is positively correlated with the tension at 50% embolism ( $T_{50}$ ) (Li *et al.*,

418 2016; Kaack *et al.*, 2019). Since  $k_a$  is a function of the ratio of  $A_p/d_m$ , it seemed reasonable to  
419 explore how this ratio changes over a factor of 10 from 2 to 0.2 m, and this was accomplished by  
420 changing  $k_a$  from  $5 \times 10^{-11}$  to  $5 \times 10^{-12}$ ;  $k_a$  is the diffusional conductance of gas in wet pit  
421 membranes times  $\Delta t$  (time step = 0.05 s). The results, pressure vs. time, are plotted in Fig. 6a, and  
422 all simulation curves were convex upward, as shown in Fig. 4b. Figure 6b is a plot of the simulated  
423 value of  $PLC_{pn}$ , that is, the model output value when the input value is 50%  $PLC$ .

424 The simulation demonstrated that changing  $k_a$  over likely values in plants increased the model-  
425 computed values of  $\Delta P_{max}$  and  $\Delta P_{50}$  when the real input value was 50% (Fig. 6a).  $\Delta P_{min}$  was  
426 unaffected by  $k_a$  because there were no embolized vessels to deliver gases (Fig. 6a). The computed  
427 tension at  $PLC_{50}$  from the Pneumatron was in error of 2% to 17% from the true value of 50% as  $k_a$   
428 increased (Fig. 6b), and hence, the Pneumatron always overestimated the tension of  $PLC_{50}$ .  
429 However, such overestimation of  $PLC_{50}$  would have a low impact on  $T_{50}$  ( $\leq 0.11$  MPa), as shown  
430 in a typical VC (Fig. 6c). This error magnitude appears to be acceptable and less than or equal to  
431 the typical disagreement in  $T_{50}$  values measured by different hydraulic methods on the same  
432 species (see review by Cochard *et al.*, 2013).

433

#### 434 *The impact of radial diffusion of gases on Pneumatron results*

435 When a vessel is embolized, gas can diffuse from the hydrated tissue immediately adjacent to  
436 the embolized vessel. When the Pneumatron pump is turned on, it draws a partial vacuum at the  
437 end of the cut stem, which causes axial diffusion of gases from the nearby embolized vessels,  
438 which are initially at atmospheric pressure. Then, as the intact vessel pressure drops, there is a  
439 tendency of gases to diffuse from the surrounding tissue. The model already demonstrated that the  
440 axial rate of diffusion was faster than the radial rate. This was the consequence of two factors: (1)  
441 the distance of radial diffusion was about 100 times greater than the axial diffusion distance in the  
442 water of pit membranes; and (2) the coefficient of diffusion was up to two orders of magnitude  
443 less in water-saturated wood (Sorz & Hietz, 2006) compared with that in pure water. The values  
444 of the  $O_2$  diffusion coefficient measured in water-saturated wood were  $1 \times 10^{-11}$  to  $2 \times 10^{-10} \text{ m}^2 \text{ s}^{-1}$ ,  
445 which were lower than that in pure water ( $2 \times 10^{-9} \text{ m}^2 \text{ s}^{-1}$ ). The default value used for our  
446 calculations was  $5 \times 10^{-11}$ . We used this low value because the wood samples studied by Sorz &  
447 Hietz (2005) were from stems that still had some embolism (5–20% gas volume). Exactly where  
448 this gas was located was not specified by the authors, but the range of gas contents was close to

449 the percentage of stem volume that contained vessel lumina in most woody species (5–20%)  
450 (Zanne *et al.*, 2010; Morris *et al.*, 2016). Increasing the gas content by another 10% typically  
451 caused a ten-fold increase in the diffusion coefficient. This is because the pathway of gas  
452 movement involves water and air in parallel and series pathways, and the coefficient of diffusion  
453 of gas in gaseous medium is  $10^4$  times larger than that in water (Table 1). Hence, the  $5 \times 10^{-11}$   
454 value we used may still have been too large and was already five times the minimum value (Sorz  
455 & Hietz, 2006). Starting with the default values (Table 2), the percentage of gas extracted from  
456 radial pathways was 8.2% of the total amount of gas extracted. Decreasing the diffusion coefficient  
457 by a factor of two decreased this percentage to 5.4%, and increasing the diffusion coefficient by a  
458 factor of two increased the radial extraction to 12.2%. The readers are invited to enter their own  
459 values in the Pneumatron Excel spreadsheet. Hence, our sensitivity analysis suggests that  $PLC_{P_n}$   
460 may be a robust estimate of hydraulic  $PLC$ .

461

## 462 **Discussion**

463 *The initial rate of gas extraction is the best predictor of embolism*

464 Common sense, experimental data, and theoretical models all point to the most important  
465 conclusions: the initial rate of gas extraction is the best predictor of the cut shoot  $PLC$ . In the first  
466 second or less, gas is extracted only from the first intact, embolized vessels from the base of an  
467 excised organ. The gas pressure must drop in the first vessel lumen before gas can be extracted  
468 from the adjacent vessel down the chain, or before it can be extracted from the gas dissolved in  
469 radially connected tissue. Therefore, what we might want to measure is the initial slope of  $dP/dt$ .  
470 There is experimental evidence supporting this finding, as the highest overall agreement between  
471 VCs based on the Pneumatron and a flow-centrifuge method was found after 15 s of gas extraction  
472 (Palighi *et al.*, submitted).

473 Previous studies (Pereira *et al.* 2016, 2020; Zhang *et al.*, 2018) computed  $\Delta P = P_i - P_t$ , where  
474  $P_i$  is the initial pressure (at time zero) and  $P_t$  is the pressure measured at time  $t = 60$  s, 30 s, or 15  
475 s. However, there is an inherent uncertainty in knowing time zero when the vacuum pump that  
476 draws down the pressure is turned off, and there is also an uncertainty of each pressure  
477 measurement  $P_0, P_1 \dots P_i$ ; call this uncertainty  $\pm\delta P_e$  and the time uncertainty  $\pm\delta t$ . The combined  
478 uncertainty is then  $(\delta t^2 + \delta P_e^2)^{0.5}$ . There could also be a transient period immediately after turning  
479 off the pump until the pressure is approximately equalized between the pressure sensor and the



480 cut-open vessels. It could be argued that the best way to deal with this uncertainty, once you have  
481 optimized time and pressure measurements, is to perform a regression of  $P_t$  versus  $t$ , in perhaps a  
482 3-s time interval, and use the slope,  $m$ , of a linear regression to obtain the initial slope. Therefore,  
483  $PLC_{Pn}$  would be based on slope  $m$ .

484 Modeling results are often useful, but their precision may not correspond to the precision of real  
485 experimental results. Some insights can be gained from a brief look at real data. Currently, the  
486 time step used for Pneumatron measurements using a programmed Arduino-based system is 0.5 s.  
487 A cursory examination of a typical dataset taken during the dehydration of a *Eucalyptus* shoot with  
488 attached leaves revealed that the first few points after the pump was turned off followed a  
489 curvilinear trend during the first 2.5 s (Fig. 7a), but later appeared to be more linear. The slope  
490 versus time of dehydration showed a good trend for 3-s regression periods (seven-point regression  
491 from time 3 to 6 s, with measurements taken every 0.5 s) and for a 7-s regression period (13-point  
492 regression from time 3 to 10 s), but the slope for the longer regression period is less than that for  
493 the shorter period (Fig. 7b). The  $R^2$  values of the regressions showed marked differences during  
494 the 20-h dehydration experiment. This revealed that even shorter times for regressions rather than  
495 just pressure differences over 15 s might yield quite precise results.

496 Using the UPPn model, we can also show that the  $PLC_{Pn}$  values are closer to the real  $PLC$  values  
497 over the entire range of the VC (Table 3). While varying the number of vessels connected axially  
498 from 1 to 10,  $PLC_{Pn}$  was 57.5% to 57.8% and, hence, depended somewhat on the number of vessels  
499 connected. However, when slope  $m$  was used, the  $PLC_{Pn}$  was 52.3% and was much less dependent  
500 on the number of vessels in series. The absolute error of 2.4% in  $PLC_{Pn}$  would cause a typical error  
501 of  $T_{50}$  by <30 kPa. The lack of dependence on the number of vessels in series is very fortunate,  
502 since we have no way of knowing how many vessels will be embolized in series as a function of  
503  $PLC$ .

504

#### 505 *Insights from a theoretical approach on plant pneumatics*

506 Much more work on modeling of gas movement in stems seems to be merited by the  
507 encouraging results of this study. The tentative conclusion from the mathematical modeling of the  
508 biophysical process of gas movement in woody stems provides strong justification for the  
509 pneumatic method of measuring VCs and gas kinetics.

510 The main shortcoming of all mathematical models is that they cannot disprove experiments.  
511 This is because the validity of models always depends on the underlying assumptions made in the  
512 model. Thus, when a model provides confirmation of experimental results, it provides a theoretical  
513 basis for believing the experimental results. However, when results from well-designed and well-  
514 executed experiments disagree with a model, the model must always be presumed wrong.

515 If sometimes the pneumatic measurements produced a VC that readers found difficult to believe,  
516 it seems likely that it could be traced to methodological errors in the measurement of xylem water  
517 potential, and/or errors in the pneumatic measurements. For instance, incorrect estimation of the  
518 minimum and maximum amount of air discharge ( $\Delta P_{min}$ , and  $\Delta P_{max}$ , respectively), are well  
519 known to result in VCs that should be interpreted carefully (Chen *et al.*, 2020; Sergent *et al.*, 2020;  
520 Pereira *et al.*, 2021). Users who are new to the Pneumatic method should pay special attention that  
521 stable measurements of  $\Delta P_{min}$  and  $\Delta P_{max}$  are obtained (Chen *et al.*, 2020), which is easier when  
522 working with a Pneumatron than applying the manual pneumatic approach (Trabi *et al.*,  
523 Submitted). The importance of which measurement values are considered as the functional starting  
524 and ending point also applies to hydraulic vulnerability curves (Choat *et al.*, 2010; Jansen *et al.*,  
525 2015). Moreover, unstable values of  $\Delta P_{min}$  and  $\Delta P_{max}$  are much more likely to affect VCs than  
526 speculation about cracks in xylem (Chen *et al.*, 2020), which would only affect pneumatic  
527 measurements if there would be direct cell wall openings to the intact conduits from which gas is  
528 extracted. Even if such xylem cracks would occur, it would result in a leakage that can easily be  
529 detected.

530 Although our model shows that pneumatic measurements are insensitive to vessel length ( $L_v$ ),  
531 another potential measuring error could result from the volume of the discharge tube. If the  
532 discharge volume is too large, the measuring error of the pressure sensor will be relatively large  
533 (see Fig. 4 in Jansen *et al.*, 2020). We therefore recommend to adjust the volume of the discharge  
534 tube by determining the maximum volume of the gas that can be extracted from a completely  
535 dehydrated sample before conducting VC measurements (Pereira *et al.*, 2020).

536 So far, the pneumatic method has not been successfully applied yet to Gymnosperms based on  
537 two species of Pinaceae (Zhang *et al.*, 2018) and two species of Cupressaceae (Sergent *et al.*,  
538 2020). A possible explanation for a difference between angiosperms and gymnosperms could be  
539 aspiration of the pectin-rich torus in gymnosperms (Dute *et al.*, 2015), preventing gas extraction  
540 from embolized tracheids. This could be tested by applying the Pneumatic method to gymnosperm

541 species without a torus-margo pit membrane (Bauch *et al.*, 1972), as suggested also by good  
542 agreement between pneumatic and hydraulic VCs of the vesselless angiosperm *Drimys brasiliensis*  
543 (Fig. 7 in Pereira *et al.*, 2016).

544 Comparison of the Pneumatic with hydraulic and other non-hydraulic methods has provided  
545 strong agreement for a substantial number of angiosperm species and samples (Fig. S1 and Table  
546 S2; Pereira *et al.*, 2016, 2020, 2021; Zhang *et al.*, 2018, Sargent *et al.*, 2020; Guan *et al.*, 2021;  
547 Paligi *et al.*, submitted). This agreement is especially strong when the above-mentioned caveats  
548 are considered. Therefore, we assert tentatively that there is a good theoretical and experimental  
549 basis for applying the Pneumatic method in research on plant water relations and embolism  
550 resistance.

551

## 552 **Acknowledgements**

553 This research was funded by the National Natural Science Foundation of China (31770647) to  
554 D.M.Y, and a grant from the German Research Foundation (DFG, Deutsche  
555 Forschungsgemeinschaft, project nr. 410768178) to S.J. The authors acknowledge the São Paulo  
556 Research Foundation (FAPESP, Brazil) for a grant (M.T.T. and R.V.R., grant #2019/24519-1) and  
557 fellowship (L.P. and R.V.R., grant #2017/14075-3). R.V.R. is a fellow of the National Council for  
558 Scientific and Technological Development (CNPq, Brazil).

559

560

561 **References**

562

563 **Bauch J, Liese W, Schulze R. 1972.** The morphological variability of the bordered pits  
564 membranes in gymnosperms. *Wood Science and Technology* **6**: 165-184.

565 **Benkert R, Zhu JJ, Zimmermann G, Turk R, Bentrup FW, Zimmermann U. 1995.** Long-  
566 term xylem pressure measurements in the liana *Tetrastigma voinierianum* by means of the  
567 xylem pressure probe. *Planta* **196**: 804–813.

568 **Chen Y-J, Maenpuen P, Zhang Y-J, Barai K, Katabuchi M, Gao H, Sasiwimol K, Tao L-B,**  
569 **Zhang J-L. 2020.** Quantifying vulnerability to embolism in tropical trees and lianas using five  
570 methods: Can discrepancies be explained by xylem structural traits? *New Phytologist* **229(2)**:  
571 805-819.

572 **Choat B, Drayton WM, Brodersen C, Matthews MA, Schackel KA, Wada H, McElrone AJ.**  
573 **2010.** Measurement of vulnerability to water stress-induced cavitation in grapevine: a  
574 comparison of four techniques applied to a long-vesseled species. *Plant, Cell & Environment*  
575 **33**: 1502–1512.

576 **Cochard H, Damour G, Bodet C, Tharwat I, Poirier M, Améglio T. 2005.** Evaluation of a new  
577 centrifuge technique for rapid generation of xylem vulnerability curves. *Physiologia*  
578 *Plantarum* **124**: 410–418

579 **Cochard H, Badel E, Herbette S, Delzon S, Choat B, Jansen S. 2013.** Methods for measuring  
580 plant vulnerability to cavitation: a critical review. *Journal of Experimental Botany* **64**: 4779–  
581 4791.

582 **Crank J. 1975.** *The mathematics of diffusion*. Oxford, England: Oxford University Press.

583 **Dute RR. 2015.** Development, structure, and function of torus-margo pits in conifers, Ginkgo and  
584 dicots. In: Hacke U, ed. *Functional and Ecological Xylem Anatomy*. Heidelberg New York  
585 Dordrecht London, Switzerland: Springer, 77-102.

586 **Guan X, Pereira L, McAdam S, Cao K-F, Jansen S. 2021.** No gas source, no problem: pre-  
587 existing embolism may affect non-pressure driven embolism spreading in angiosperm xylem  
588 by gas diffusion. *Plant, Cell & Environment* <https://doi.org/10.1111/pce.14016>.

589 **Hacke UG, Sperry JS, Wheeler JK, Castro L. 2006.** Scaling of angiosperm xylem structure with  
590 safety and efficiency. *Tree Physiology* **26**: 689–701.

- 591 **Jansen S, Gortan E, Lens F, Lo Gullo MA, Salleo S, Scholz A, Stein A, Trifilò P, Nardini A.**  
592 **2011.** Do quantitative vessel and pit characters account for ion-mediated changes in the  
593 hydraulic conductance of angiosperm xylem? *New Phytologist* **189**: 218–228.
- 594 **Jansen S, Guan X, Kaack L, Trabi C, Miranda MT, Ribeiro RV, Pereira L. 2020.** The  
595 Pneumatron estimates xylem embolism resistance in angiosperms based on gas diffusion  
596 kinetics: a mini-review. *Acta Horticulturae* **1300**: 193-200.
- 597 **Jansen S, Schuldt B, Choat B. 2015.** Current controversies and challenges in applying plant  
598 hydraulic techniques. *New Phytologist* **205**: 961-964.
- 599 **Kaack L, Altaner CM, Carmesin C, Diaz A, Holler M, Kranz C, Neusser G, Odstrcil M,**  
600 **Schenk HJ, Schmidt V et al. 2019.** Function and three dimensional structure of intervessel  
601 pit membranes in angiosperm xylem: a review. *International Association of Wood Anatomists*  
602 *Journal* **40**: 673–702.
- 603 **Kaack L, Weber M, Isasa E, Karimi Z, Li S, Pereira L, Trabi C, Zhang Y, Schenk HJ,**  
604 **Schuldt B, Schmidt V, Jansen S. Submitted.** Pore constrictions in intervessel pit  
605 membranes provide a mechanistic explanation for xylem embolism resistance in  
606 angiosperms. *New Phytologist*, preprint available at  
607 <https://doi.org/10.1101/2020.10.19.345413>.
- 608 **Lens F, Sperry JS, Christman MA, Choat B, Rabaey D, Jansen S. 2011.** Testing hypotheses  
609 that link wood anatomy and ultrastructure to cavitation resistance in the genus *Acer*. *New*  
610 *Phytologist* **190**: 709–723.
- 611 **Li S, Lens F, S Espino, Karimi Z, Klepsch M, Schenk HJ, Schmitt M, Schuldt B, Jansen S.**  
612 **2016.** Intervessel pit membrane thickness as a key determinant of embolism resistance in  
613 angiosperm xylem. *International Association of Wood Anatomists Journal* **37**: 152–171.
- 614 **Liu M, Pan R, Tyree MT. 2018.** Intraspecific relationship between vessel length and vessel  
615 diameter of four species with long-to-short species-average vessel lengths: further validation  
616 of the computational algorithm. *Trees* **32**: 51–60.
- 617 **Morris H, Plavcová L, Cvecko P, Fichtler E, Gillingham MAF, Martínez-Cabrera H,**  
618 **McGlenn DJ, Wheeler E, Zheng JM, Ziemińska K et al. 2016.** A global analysis of  
619 parenchyma tissue fractions in secondary xylem of seed plants. *New Phytologist* **209**: 1553–  
620 1565.

- 621 **Paligi SS, Link RM, Isasa E, Bittencourt P, Cabral JS, Jansen S, Oliveira R, Pereira L,**  
622 **Schuldt B. Submitted.** Accuracy of the pneumatic method for estimating xylem vulnerability  
623 to embolism in temperate diffuse-porous tree species. *New Phytologist*.
- 624 **Pereira L, Bittencourt PRL, Oliveira RS, Junior MB, Barros FV, Ribeiro RV, Mazzafera P.**  
625 **2016.** Plant pneumatics: stem air flow is related to embolism—new perspectives on methods in  
626 plant hydraulics. *New Phytologist* **211**: 357–370.
- 627 **Pereira L, Bittencourt PRL, Pacheco VS, Miranda MT, Zhang Y, Oliveira RS, Groenendijk**  
628 **P, Machado EC, Tyree MT, Jansen S et al. 2020.** The Pneumatron: An automated  
629 pneumatic apparatus for estimating xylem vulnerability to embolism at high temporal  
630 resolution. *Plant, Cell & Environment* **43**: 131–142.
- 631 **Pereira L, Bittencourt PRL, Rowland L, Brum M, Miranda MT, Pacheco VS, Oliveira RS,**  
632 **Machado EC, Jansen S, Ribeiro RV. 2021.** Using the pneumatic method to estimate  
633 embolism resistance in species with long vessels: a commentary on the article “A comparison  
634 of five methods to assess embolism resistance in trees”. *Forest Ecology and Management* **479**:  
635 118547.
- 636 **Scholz A, Rabaey D, Stein A, Cochard H, Smets E, Jansen S. 2013.** The evolution and function  
637 of vessel and pit characters with respect to cavitation resistance across 10 *Prunus* species.  
638 *Tree Physiology* **33**: 684–694.
- 639 **Sergent AS, Varela SA, Barigah TS, Badel E, Cochard H, Dalla-Salda G, Delzon S,**  
640 **Fernández ME, Guillemot J, Gyenge J, et al. 2020.** A comparison of five methods to assess  
641 embolism resistance in trees. *Forest Ecology and Management* **468**: 118175.
- 642 **Sorz J, Hietz P. 2006.** Gas diffusion through wood: implications for oxygen supply. *Trees* **20**:  
643 34–41.
- 644 **Sperry JS, Hacke UG, Pittermann J. 2006.** Size and function in conifer tracheids and  
645 angiosperm vessels. *American Journal of Botany* **93**: 1490–1500.
- 646 **Sperry JS, Hacke UG, Wheeler JK. 2005.** Comparative analysis of end wall resistivity in xylem  
647 conduits. *Plant Cell & Environment* **28**: 456–466.
- 648 **Trabi CL, Pereira L, Guan X, Miranda MT, Bittencourt PRL, Oliveira RS, Ribeiro RV,**  
649 **Jansen S. Submitted.** A user manual to measure gas diffusion kinetics in plants: Pneumatron  
650 construction, operation and data analysis. *Frontiers in Plant Science*.

- 651 **Tyree MT. 1997.** The Cohesion-Tension Theory of sap ascent: current controversies. *Journal of*  
652 *Experimental Botany* **48**: 1753–1765.
- 653 **Tyree MT, Yang S. 1992.** Hydraulic conductivity recovery versus water pressure in xylem of  
654 *Acer saccharum*. *Plant Physiology* **100**: 669–676.
- 655 **Wang Y, Liu J, Tyree MT. 2015.** Stem hydraulic conductivity depends on the pressure at which  
656 it is measured and how this dependence can be used to assess the tempo of bubble  
657 pressurization in recently cavitated vessels. *Plant Physiology* **169**: 2597–2607.
- 658 **Wei C, Tyree MT, Steudle E. 1999.** Direct measurement of xylem pressure in leaves of intact  
659 maize plants. A test of the cohesion-tension theory taking hydraulic architecture into  
660 consideration. *Plant Physiology* **121**: 1191–1205.
- 661 **Wheeler JK, Sperry JS, Hacke UG, Hoang N. 2005.** Intervessel pitting and cavitation in woody  
662 Rosaceae and other vessel plants: a basis for a safety versus efficiency trade-off in xylem  
663 transport. *Plant, Cell & Environment* **28**: 800–812.
- 664 **Yang S, Tyree MT. 1992.** A theoretical model of hydraulic conductivity recovery from embolism  
665 with comparison to experimental data on *Acer saccharum*. *Plant Cell & Environment* **15**: 633–  
666 643.
- 667 **Zanne AE, Westoby M, Falster DS, Ackerly DD, Loarie SR, Arnold SEJ, Coomes DA. 2010.**  
668 Angiosperm wood structure: Global patterns in vessel anatomy and their relation to wood  
669 density and potential conductivity. *American Journal of Botany* **97**: 207–215.
- 670 **Zhang Y, Lamarque LJ, Torres-Ruiz JM, Schuldt B, Karimi Z, Li S, Qin DW, Bittencourt**  
671 **P, Burlett R, Cao KF et al. 2018.** Testing the plant pneumatic method to estimate xylem  
672 embolism resistance in stems of temperate trees. *Tree Physiology* **38**: 1016–1025.
- 673 **Zhang Y, Carmesin C, Kaack L, Klepsch MM, Kotowska M, Matei T, Schenk HJ, Weber**  
674 **M, Walter P, Schmidt V et al. 2020.** High porosity with tiny pore constrictions and  
675 unbending pathways characterise the 3D structure of intervessel pit membranes in angiosperm  
676 xylem. *Plant, Cell and Environment* **43**: 116–130.
- 677 **Zimmermann MH, Tomlinson PB. 1966.** An analysis of complex vascular systems in plants:  
678 optical shuttle method. *Science* **152**: 72–73.

679  
680  
681

682 **Supporting information**

683

684 Additional supporting information may be found in the online version of this article.

685

686 **Fig. S1** Comparison of embolism resistance measured with the Pneumatic method and other  
687 methods.

688

689 **Table S1** Excel spreadsheet of the UPPn model to simulate gas kinetics.

690

691 **Table S2** Published values of embolism resistance estimated with the Pneumatic and other  
692 methods.

693

694 **Note S1** Description of the basic layout of the UPPn model as shown in the Excel spreadsheet.

695



696 **Figure legends**

697

698 **Figure 1.** (a) A cut-open vessel and an intact vessel showing diameters of the vessel (far right,  
699  $d_{w2}$ ), diameter of the cut vessel shell (far left,  $d_{w1}$ ), and diameter of the intact vessel shell in the  
700 middle ( $d_v$ ). (b) The ratio of wood to vessel diameters versus *PLC* used in the Unit Pipe Pneumatic  
701 model. The diameter of a wood volume is scaled so that all water-saturated wood is shared equally  
702 by the embolized unit pipes. Thus, if *PLC* is less than 100% in a region of wood, then the vessels  
703 that are embolized will share more wood diameter. Considering the fraction of wood area that is  
704 vessel lumina ( $\alpha_x$ ), vessel diameter ( $d_v$ ), and wood diameter ( $d_w$ ) in the unit pipe model, the ratio  
705  $d_w/d_v$  is given by  $(\alpha_x PLC/100\%)^{0.5}$ , as shown in (b).

706

707 **Figure 2.** Simulated absolute pressures according to the Unit Pipe Pneumatic model measured by  
708 the pressure transducer (blue, #0) and as computed in the intact, embolized vessel. All vessels start  
709 out at full atmospheric pressure. In the first 15 s after drawing a partial vacuum, almost no change  
710 is detected in the seventh vessel down the chain. The pressure transducer is in pressure equilibrium  
711 with the cut vessels. Vessel number is indicated below each line where space permits.

712

713 **Figure 3.** Temporal dynamics of the axial concentrations of air in the aqueous phase of water-  
714 filled walls and wood fiber cells when 50% of the vessels are embolized. Each colored line equals  
715 the concentration of gas in water in a concentric ring of wood around the vessel. In the legend, R1,  
716 means the ring nearest the first vessel, R2, means the second ring from the vessel, etc.

717

718 **Figure 4.** (a) Temporal dynamics of simulated pressure output (kPa) at the pressure transducer  
719 with varying *PLC*. In the simulation, the partial vacuum is drawn in the 1-s interval before time 0  
720 on the x-axis. The different curves give the gas pressure change when varying the percentage of  
721 embolism in the stem (shown on the right). (b) A plot of simulated *PLC* from the model versus the  
722 input *PLC*. The points are taken from the curves in (a) at  $t = 15$  s using Eq. (4). The black line  
723 represents the 1:1 line.

724

725 **Figure 5.** The percentage of gas extracted from the vessel in the first 15 s of the Unit Pipe  
726 Pneumatic model simulation as affected by vessel diameter. The percentages are percent of total  
727 gas extraction from the embolized vessels plus the air extracted from the water surrounding the  
728 embolized vessels.

729

730 **Figure 6.** Theoretical impact of axial conductance of pit membranes to air diffusion ( $k_a$ ) on the  
731 computed change in gas pressure ( $\Delta P$ ). (a) The computed pressure values after 15 s for 0 ( $\Delta P_{\min}$ ),  
732 50% ( $\Delta P_{50}$ ), and 100% ( $\Delta P_{\max}$ ) embolism as affected by  $k_a$ . (b) The pneumatic value of  $PLC_{50}$  as  
733 affected by  $k_a$ . (c) The maximum likely error in determining the tension at 50%  $PLC$  ( $T_{50}$ ) is shown  
734 on a typical vulnerability curve, assuming an overestimation of 17% in  $PLC_{50}$ .

735

736 **Figure 7.** Analysis of experimental Pneumatron data collected during the dehydration of a  
737 *Eucalyptus camaldulensis* Dehnh. shoot with leaves. (a) Typical change in absolute pressure with  
738 time during shoot dehydration. (b) Slopes calculated for 3-s (black symbols) and 7-s periods (blue  
739 symbols) as affected by the dehydration time. Slopes were calculated after the initial 3 s, when  
740 there was a linear correlation between pressure and time, as shown in (a). (c)  $R^2$  values of slope  
741 values shown in (b) during dehydration time.

742

743

744

745 **Tables**

746

747 **Table 1.** Henry's law constants ( $H^{cc}$ ), diffusion coefficients in water ( $D_{g,aq}$ ) and air ( $D_{g,air}$ ), and  
748 gas concentration in water ( $C_{aq}$ ) and air ( $C_{air}$ ).  $RT = 24.8 \text{ L bar mol}^{-1}$ ,  $1.013 \text{ bar} = 1 \text{ atm}$ . Avg =  
749 weighted average = sum of %air  $\times D_{g,aq}$  (or  $H^{cc}$ ). If Ar is ignored, the weighted averages are slightly  
750 different.

751

| Gas            | $D_{g,aq}$<br>( $\text{m}^2 \text{ s}^{-1}$ ) | $D_{g,air}$<br>( $\text{m}^2 \text{ s}^{-1}$ ) | $H^{cc}$<br>( $C_{aq}/C_{air}$ ) | $C_{aq}$<br>(mM) | $C_{air}$<br>(mM) | Air<br>(%) |
|----------------|-----------------------------------------------|------------------------------------------------|----------------------------------|------------------|-------------------|------------|
| Ar             | 2.00E-09                                      | 7.03E-05                                       | 3.43E-02                         | 1.40E-02         | 0.41              | 1          |
| O <sub>2</sub> | 1.88E-09                                      | 1.58E-05                                       | 3.18E-02                         | 2.60E-01         | 8.17              | 20         |
| N <sub>2</sub> | 2.10E-09                                      | 1.76E-05                                       | 1.49E-02                         | 4.81E-01         | 32.27             | 79         |
| Avg            | 2.06E-09                                      |                                                | 1.83E-02                         |                  |                   |            |

752

753

754 **Table 2:** Values that must be entered in the UPPn model Excel spreadsheet. The non-bold values  
 755 are entered by the user; the **bold** values are calculated by Excel.

756

| <i>Abbreviation</i> | <i>Value</i>    | <i>Units</i>                   | <i>Definition</i>                                                                             |
|---------------------|-----------------|--------------------------------|-----------------------------------------------------------------------------------------------|
| $H^{cc}$            | 1.83E-02        |                                | Henry's law constant (weighted average for N <sub>2</sub> & O <sub>2</sub> )                  |
| $C_{g,air}$         | 4.098E+01       | mol m <sup>-3</sup>            | Air concentration at atmospheric pressure (saturation value)                                  |
| $D_{gw}$            | 5.00E-11        | m <sup>2</sup> s <sup>-1</sup> | Diffusion coefficient of gas in wet wood                                                      |
| $D_g$               | 1.00E-09        | m <sup>2</sup> s <sup>-1</sup> | Diffusion coefficient of gas in wet pit membrane                                              |
| $d_v$               | 4.00E-05        | m                              | Mean vessel diameter, diameter shared when overlapping                                        |
| $L_v$               | <b>6.20E-02</b> | m                              | Mean vessel length (this is computed, but can be entered manually) $2 \times 10^5 d_v^{1.48}$ |
| $0.5L_v$            | <b>3.10E-02</b> | m                              | Cut-open vessel length                                                                        |
| $f_v$               | 5.0             | %                              | Fraction of vessel wall surface in common between vessels                                     |
| $2E5*a_x$           | <b>10.0</b>     | %                              | Fraction of vessel lumen in stem cross section                                                |
| $V_v/2$             | <b>3.89E-11</b> | m <sup>3</sup>                 | Volume of cut-open vessel                                                                     |
| $K_{pff}$           | 0.5             | %                              | Fraction of the intervessel pit field that is pit membrane                                    |
| $d_m$               | 5.00E-07        | m                              | Pit membrane thickness                                                                        |
| $A_p$               | <b>1.95E-07</b> | m <sup>2</sup>                 | Total pit membrane surface area                                                               |
| $V_{t+v1}$          | <b>2.05E-06</b> | m <sup>3</sup>                 | volume of $V_{t+v1}$                                                                          |
| $V_v$               | <b>7.79E-11</b> | m <sup>3</sup>                 | Volume of one vessel $V_v = \pi(d_v/2)^2 L_v$                                                 |
| $V_{cov}$           | <b>5.47E-07</b> | m <sup>3</sup>                 | Volume of all cut-open vessels $= 0.5 V_v N_v$                                                |
| $d_t$               | 0.05            | s                              | The time step in the simulation                                                               |
| $V_t$               | 1.50E-06        | m <sup>3</sup>                 | external tubing, $V_t$ 1.5 mL tube                                                            |
| $d_w$               | 0.015           | m                              | Diameter of wood in stem                                                                      |
| $N_v$               | <b>1.41E+04</b> |                                | Number of vessels $= a_x(0.015/d_v)^2$                                                        |
| $N_{ve}$            | <b>1.41E+04</b> |                                | Number of vessels embolized to right $= P_{LC} N_v$                                           |
| $V_{t+v}$           | <b>2.05E-06</b> | m <sup>3</sup>                 | Volume of cut-open vessels plus tubing                                                        |

757

758 Notes: The first two values are physical constants that should not be altered. The next two values  
 759 are diffusion coefficients for gases in lignified wood ( $D_{gw}$ ) (Soriz & Hietz 2005) and pit membranes  
 760 ( $D_g$ ). The estimated  $D_g$  was reduced by 20% to allow for the pit membrane having solid cellulose  
 761 fibers occupying approximately 20% of the volume. The following three values are all available  
 762 from the literature (Zanne *et al.*, 2010; Morris *et al.*, 2016) or can be measured anatomically: (1)

763 the fraction of vessel walls in common between vessels (Sperry *et al.*, 2005; 2006), (2) the  
764 percentage of stem cross section that is vessel, and (3) vessel diameter. The fraction of pits in the  
765 pit field varies over a narrow range from 0.4 to 0.6 (Lens *et al.*, 2011; Scholz *et al.*, 2013). The  
766 thickness of pit membranes varies from 0.2 to 1.3  $\mu\text{m}$  (Li *et al.*, 2016; Kaack *et al.*, 2019). Finally,  
767  $\text{dt}$  is a step time interval that must be small enough for the computational results to be stable. This  
768 is determined by trial and error and changes with the impact of all the other parameters. The last  
769 two values are the volume of tubing connected to the pressure transducer and the diameter of the  
770 wood. These values are used to compute the number of vessels and the external volume per vessel,  
771 because the UPPn needs to scale the volume where pressure is measured in a single vessel series  
772 (unit pipe). Vessel length,  $L_v$ , is computed, but has no influence on the model results. However, it  
773 is important for experimental design because excised shoots must be cut several times longer than  
774 the vessels contained in shoot segments. Not shown in this table, but calculated in the Excel  
775 spreadsheet are one value of axial conductance ( $K_a$ ) for axial diffusion of air through pits (Eq. 9)  
776 and six values of radial conductance ( $K_r$ ) for the radial diffusion of air through the six radial shells  
777 (Eq. 5) around each vessel;  $K_a$  and  $K_r$  have units equal to  $\text{m}^3$ .

778

779 **Table 3.** This table used the default parameters in Table 2 in the Pneumatron Excel spreadsheet to  
780 compute the values shown below. The number of vessels in series (in the first column) connected  
781 axially was varied from 1 to 10. The 3-s interval used for these calculations was from  $t = 3$  to 6 s.  
782

| #vessels | First 15 s, $\Delta P$ (kPa) |              |                   | PLC <sub>Pn</sub> | Slope (kPa s <sup>-1</sup> ), 3 s |       |            | PLC <sub>Pn</sub> |
|----------|------------------------------|--------------|-------------------|-------------------|-----------------------------------|-------|------------|-------------------|
|          | $\Delta P_{\min}$            | $\Delta P_x$ | $\Delta P_{\max}$ |                   | $m_{\min}$                        | $m_x$ | $m_{\max}$ |                   |
| 1        | 0.400                        | 3.649        | 6.051             | 57.49%            | 0.042                             | 0.427 | 0.777      | 52.35%            |
| 2        | 0.400                        | 4.219        | 7.011             | 57.78%            | 0.042                             | 0.433 | 0.789      | 52.35%            |
| 3        | 0.400                        | 4.257        | 7.076             | 57.77%            | 0.042                             | 0.433 | 0.789      | 52.35%            |
| 10       | 0.400                        | 4.258        | 7.079             | 57.77%            | 0.042                             | 0.433 | 0.789      | 52.35%            |

783

784

785 Figure 1

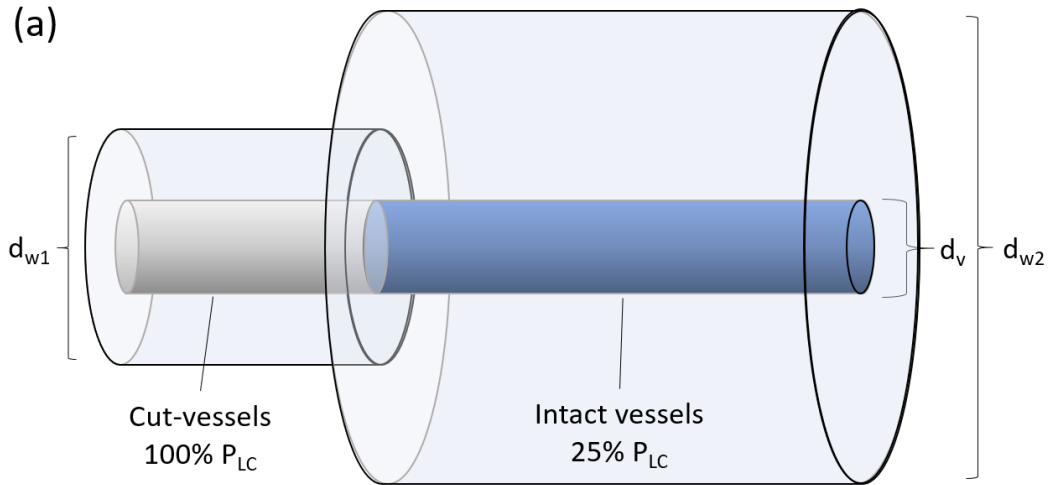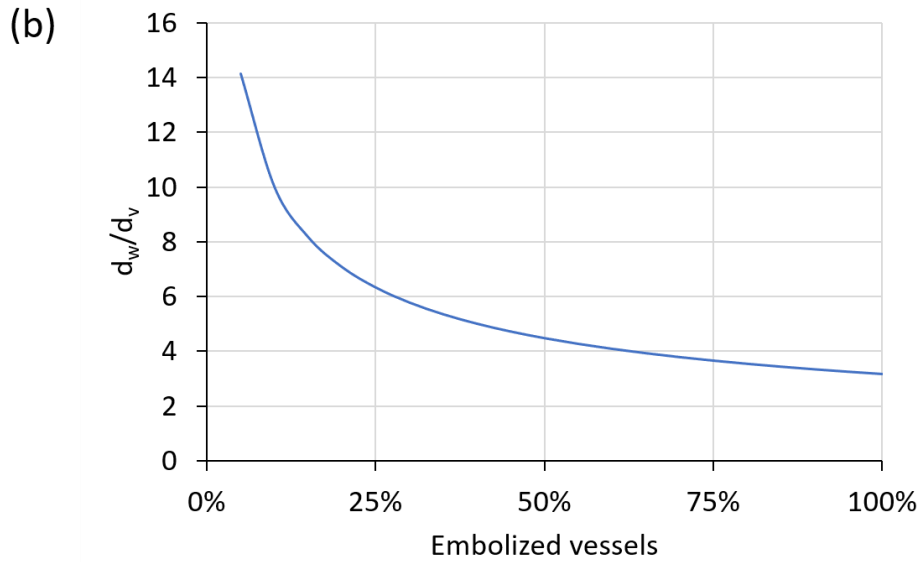

786

787

788 Figure 2

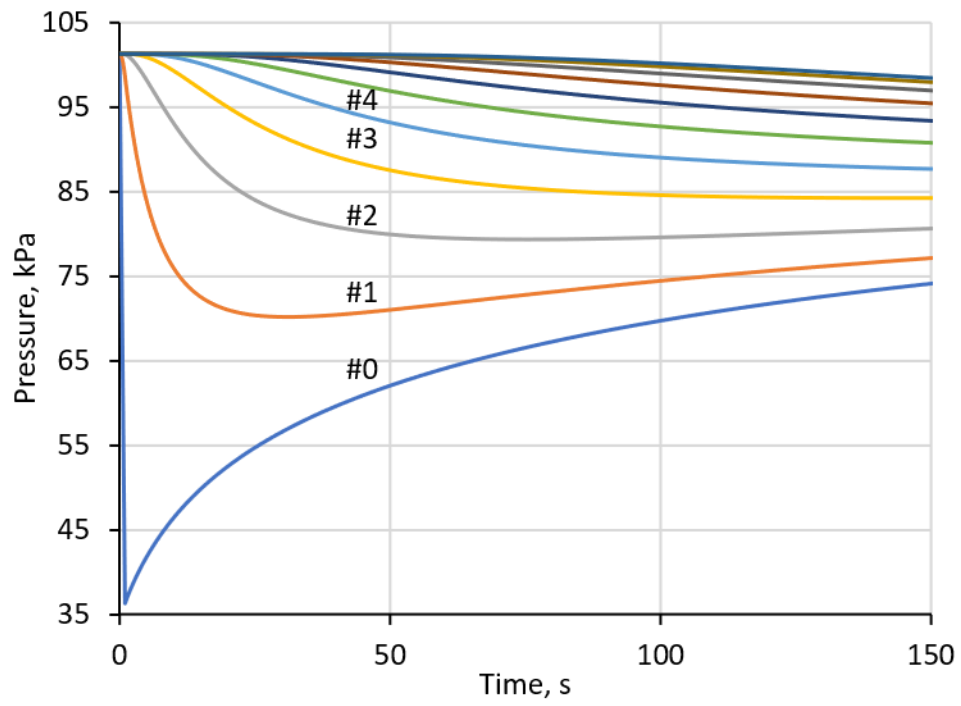

789

790



791 Figure 3

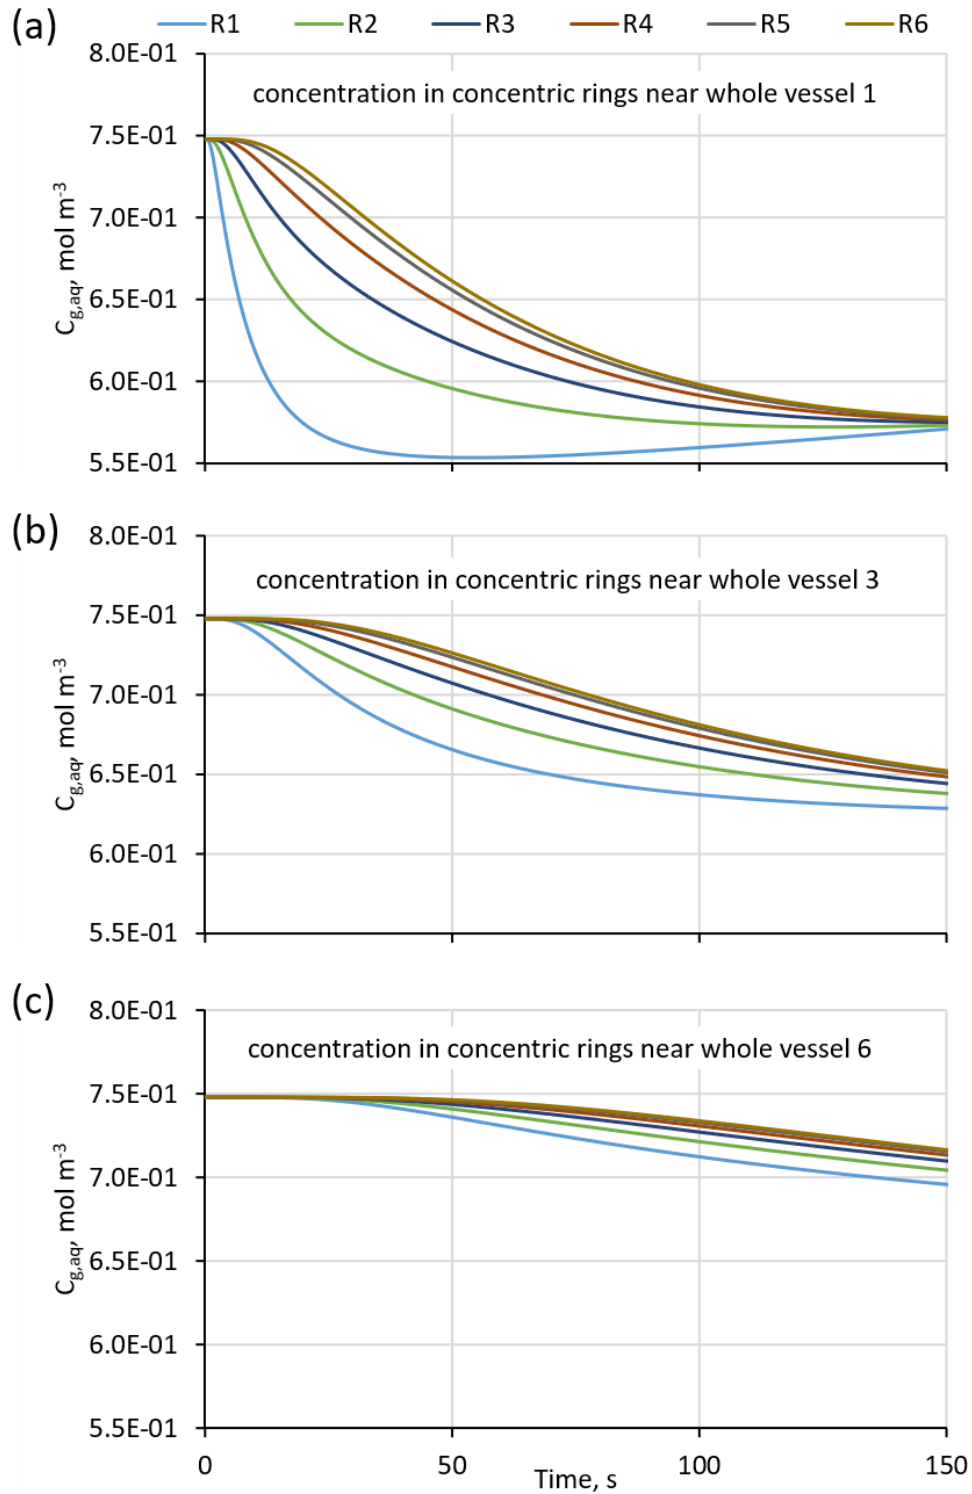

792

793

794 Figure 4

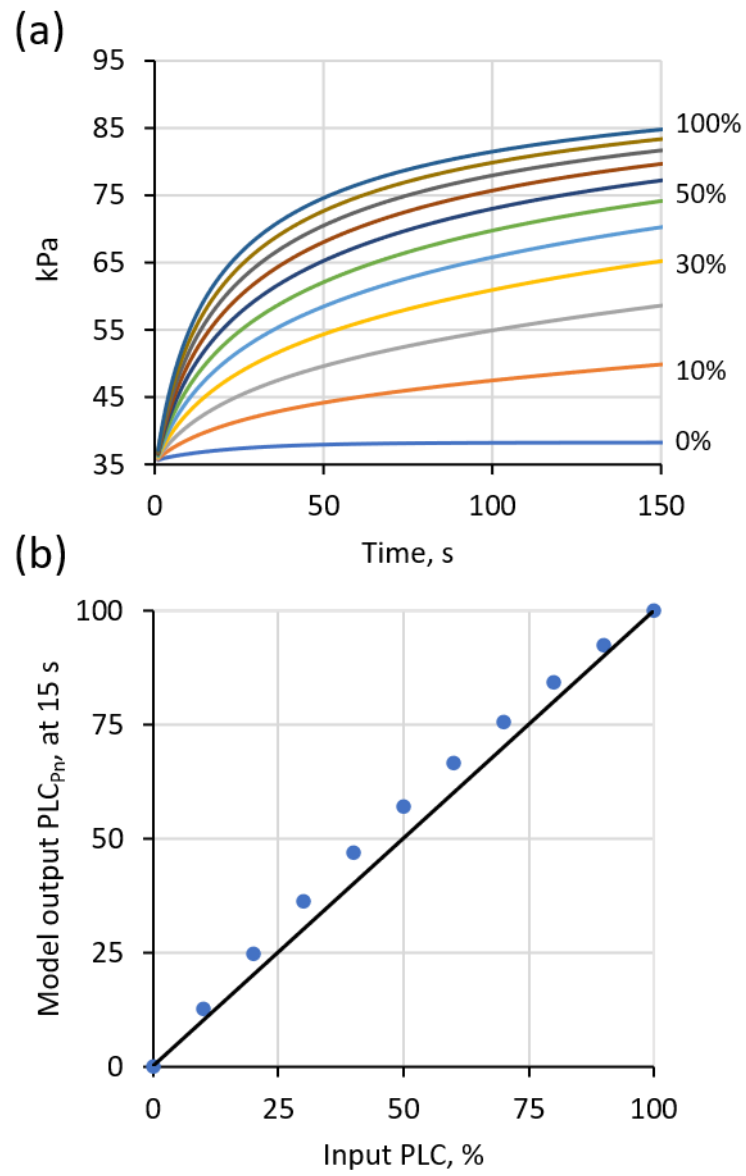

795

796

797 Figure 5

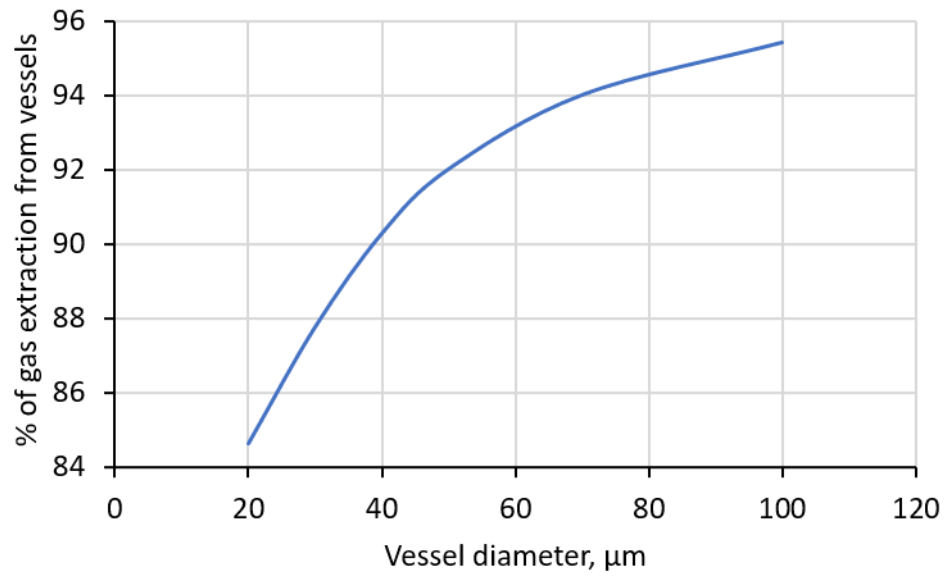

798

799

800 Figure 6

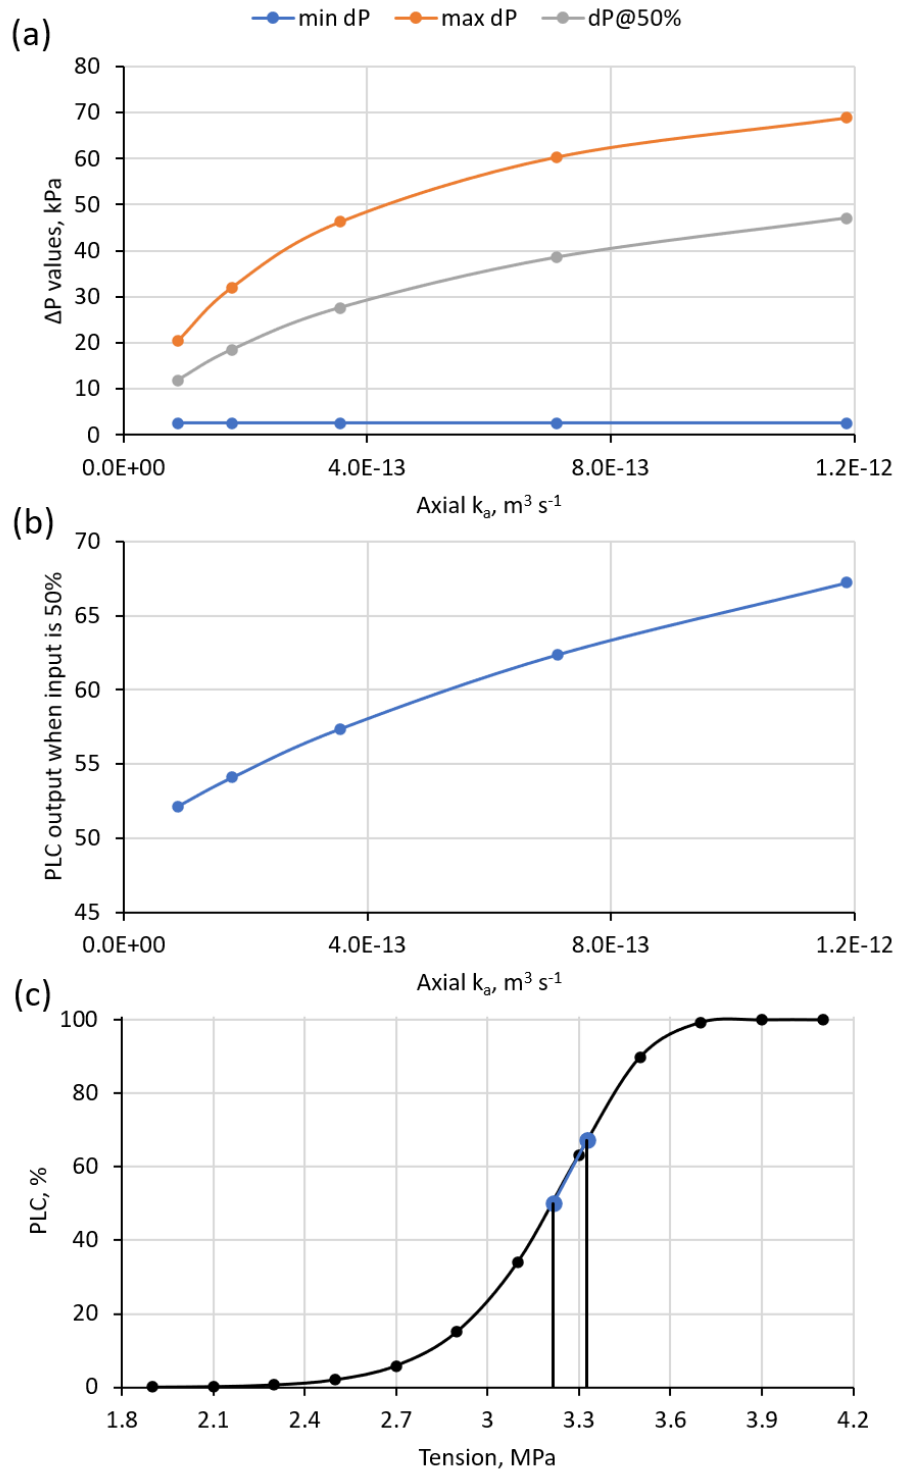

801

802

803 Figure 7

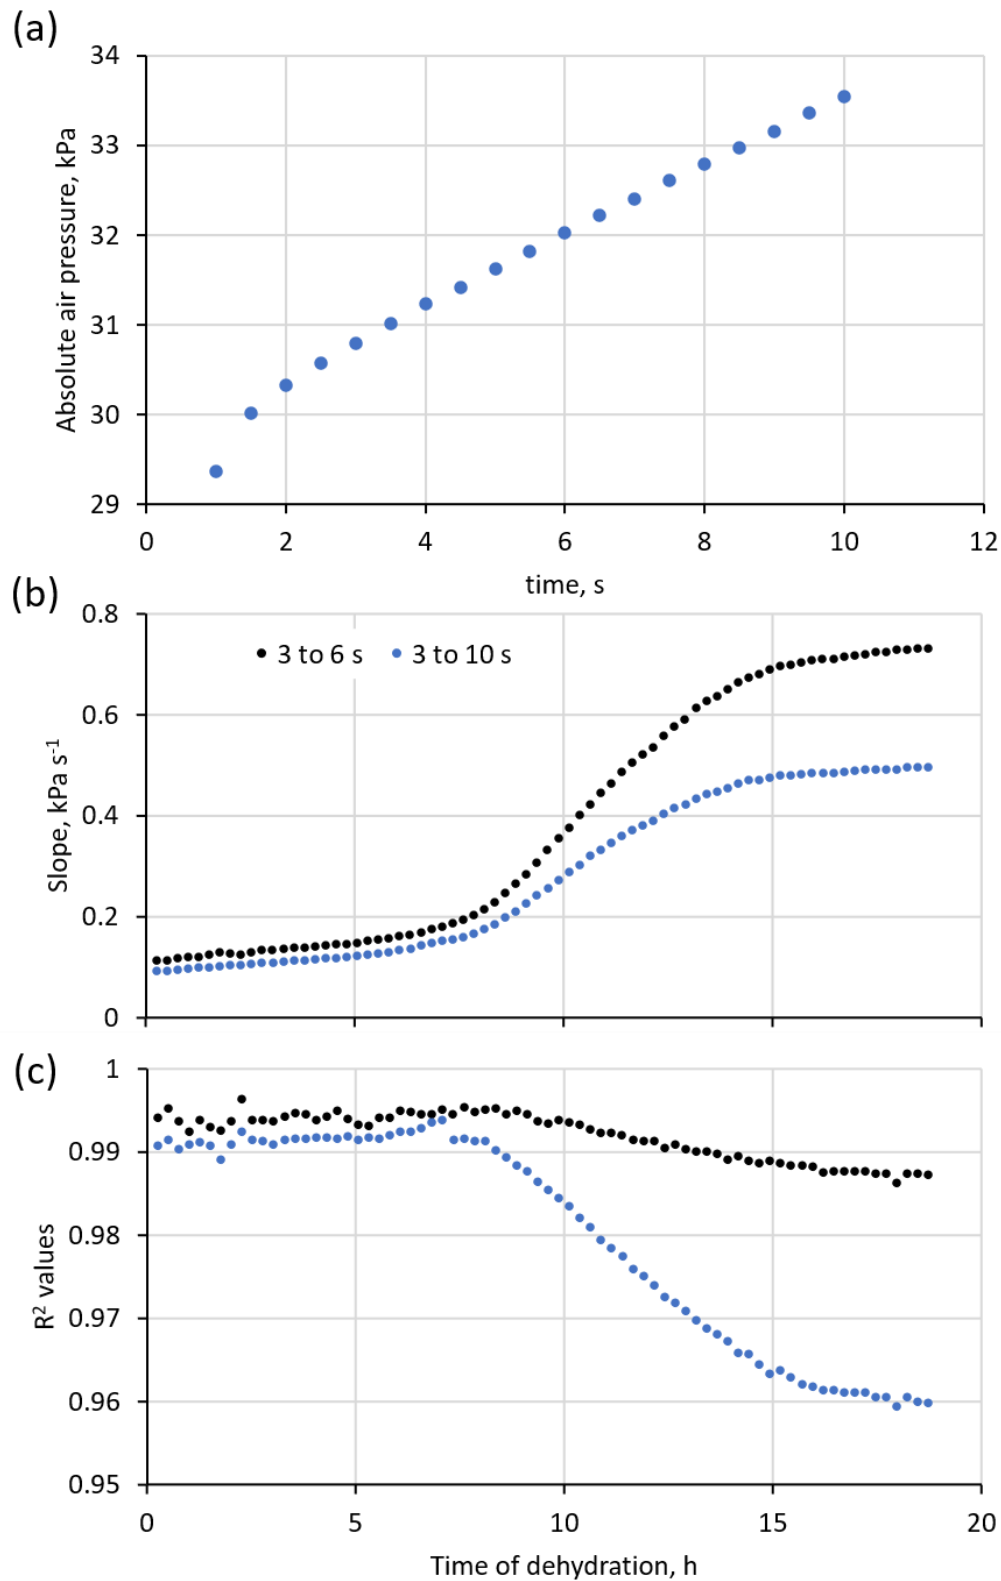

804
